# Supplementary material for: Magnetotransport Studies of Encapsulated Topological Insulator Bi2Se3 Nanoribbons
Source: MDPI journal article supplement (doi:10.3390/nano12050768), 2022-02-24
Supplement: s1 [file s1]

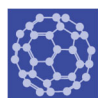

Supplementary Information:

# Magnetotransport studies of encapsulated topological insulator Bi<sub>2</sub>Se<sub>3</sub> nanoribbons

G. Kunakova<sup>1</sup>, E. Kauranens<sup>1</sup>, K. Niherysh<sup>1,2</sup>, M. Bechelany<sup>3</sup>, K. Smits<sup>4</sup>, G. Mozolevskis<sup>4</sup>, T. Bauch<sup>5</sup>, F. Lombardi<sup>5</sup>, D. Erts<sup>1</sup>

<sup>1</sup>Institute of Chemical Physics, University of Latvia, 19 Raina Blvd., LV-1586 Riga, Latvia

<sup>2</sup>Research and Development department, Integrated Micro- and Nanosystems, Belarusian State University of Informatics and Radioelectronics, P. Brovki Str. 6, 220013 Minsk, Belarus

<sup>3</sup>Institut Européen des Membranes, IEM, UMR 5635, University of Montpellier, ENSCM, CNRS, 34095, Montpellier, France

<sup>4</sup>Institute of Solid State Physics, University of Latvia, Kengaraga 8, Riga, LV-1063, Latvia

<sup>5</sup>Quantum Device Physics Laboratory, Department of Microtechnology and Nanoscience, Chalmers University of Technology, SE-41296 Goteborg, Sweden

**Citation:** Kunakova, G.; Kauranens, E.; Niherysh, K.; Bechelany, M.; Smits, K.; Mozolevskis, G.; Bauch, T.; Lombardi, F.; Erts, D. Magnetotransport studies of encapsulated topological insulator Bi<sub>2</sub>Se<sub>3</sub> nanoribbons. *Nanomaterials* **2022**, *12*, 768. <https://doi.org/10.3390/nano12050768>

Academic Editor: Yanquan Geng

Received: date: 27 January 2022

Accepted: date: 20 February 2022

Published: 24 February 2022

**Publisher's Note:** MDPI stays neutral with regard to jurisdictional claims in published maps and institutional affiliations.

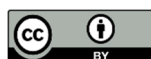

**Copyright:** © 2022 by the authors. Licensee MDPI, Basel, Switzerland. This article is an open access article distributed under the terms and conditions of the Creative Commons Attribution (CC BY) license (<https://creativecommons.org/licenses/by/4.0/>).

## 1. Physical parameters of as-grown and ZnO encapsulated Bi<sub>2</sub>Se<sub>3</sub> nanoribbons

**Table S1.** Physical parameters of as grown Bi<sub>2</sub>Se<sub>3</sub> and ZnO encapsulated Bi<sub>2</sub>Se<sub>3</sub> nanoribbons on Si/SiO<sub>2</sub> and h-BN substrates;  $t_{NR}$  is the thickness;  $w$  is the width and  $L$  is the length of the nanoribbon.  $t_{h-BN}$  is the thickness of the h-BN flake.

| NR batch<br>KN_211220 | NR               | $t_{h-BN}$ ,<br>nm | $t_{NR}$ , <sup>1</sup><br>nm | $w$ ,<br>nm | $L$ ,<br>μm | $n_{2D\ LF}$ ,<br>$\times 10^{13}\text{ cm}^{-2}$ | $n_{2D\ HF}$ ,<br>$\times 10^{13}\text{ cm}^{-2}$ | $R_{sh}$ ,<br>$\Omega/\text{sq.}$ | $\mu$ , <sup>2</sup><br>$\text{cm}^2/\text{V}\cdot\text{s}$ | $\mu_{FE}$ ,<br>$\text{cm}^2/\text{V}\cdot\text{s}$ |
|-----------------------|------------------|--------------------|-------------------------------|-------------|-------------|---------------------------------------------------|---------------------------------------------------|-----------------------------------|-------------------------------------------------------------|-----------------------------------------------------|
| + 2 nm of ZnO         | A1t <sup>3</sup> |                    | 44.5                          | 804         | 3.60        | 0.89                                              | 1.21                                              | 181                               | 2865                                                        |                                                     |
|                       |                  |                    | 44.5                          | 804         | 3.60        | 1.38                                              | 1.93                                              |                                   | 1793                                                        |                                                     |
|                       | A1b <sup>3</sup> | 56                 | 35                            | 553         | 3.46        | 0.92                                              | 1.06                                              | 143                               | 4100                                                        | 1182                                                |
|                       |                  | 56                 | 35                            | 553         | 3.46        | 1.13                                              | 1.31                                              |                                   | 3339                                                        |                                                     |
|                       | A3t <sup>3</sup> | 32                 | 29                            | 1932        | 3.99        | 0.89                                              | 1.19                                              | 224                               | 2325                                                        | 2278                                                |
|                       |                  | 32                 | 29                            | 1932        | 3.99        | 0.92                                              | 1.09                                              |                                   | 2547                                                        |                                                     |
|                       | D3b              | 43                 | 34                            | 368         | 3.47        | 0.87                                              | 1.18                                              | 538                               | 981                                                         |                                                     |
|                       | D4t <sup>3</sup> |                    | 35                            | 923         | 6.47        | 1.53                                              | 2.21                                              | 129                               | 2189                                                        | 501                                                 |
|                       |                  |                    | 35                            | 923         | 6.47        | 1.53                                              | 2.19                                              |                                   | 2213                                                        |                                                     |
|                       | E2b              |                    | 32                            | 1504        | 4.72        | 0.99                                              | 1.35                                              | 338                               | 1368                                                        |                                                     |
| As grown              | A4t              |                    | 28                            | 409         | 5.61        | 2.52                                              | 2.72                                              | 342                               | 672                                                         |                                                     |
|                       | B1 <sup>3</sup>  |                    | 40                            | 1688        | 5.39        | 0.96                                              | 1.16                                              | 263                               | 2040                                                        |                                                     |
|                       |                  |                    | 40                            | 1688        | 5.39        | 0.88                                              | 1.04                                              |                                   | 2276                                                        |                                                     |
|                       | B2               |                    | 31                            | 1436        | 4.60        | 0.95                                              | 1.19                                              | 232                               | 2257                                                        |                                                     |
|                       | C2b <sup>3</sup> |                    | 38                            | 1104        | 5.47        | 1.07                                              | 1.36                                              | 261                               | 1754                                                        |                                                     |
|                       |                  |                    | 38                            | 1104        | 5.47        | 1.64                                              | 1.70                                              |                                   | 1409                                                        |                                                     |
|                       | C5b              |                    | 30                            | 640         | 4.73        | 0.72                                              | 1.33                                              | 224                               | 2093                                                        |                                                     |

<sup>1</sup> Thickness accounts for the two ~2 nm thick ZnO layers.

<sup>2</sup>  $\mu$  is calculated using the  $n_{2D\ HF}$ .

<sup>3</sup> Values of the carrier densities are calculated from the two datasets of  $R_{xy}(B)$ , where each of them is measured using different pair of the Hall electrodes, on the same nanoribbon.

Table S1 summarizes nanoribbon dimensions and charge transport parameters calculated from the magnetotransport data. Nanoribbon and exfoliated h-BN flake thicknesses are measured using atomic force microscopy, while the nanoribbon width is determined via scanning electron microscopy imaging. Values of the charge carrier densities  $n_{2D\ LF}$  and  $n_{2D\ HF}$  are calculated using eq.1 of the main text, and subscript “LF” and “HF” represent range of the magnetic field used to determine the slope of the anti-symmetrized  $R_{xy}(B)$  data. LF and HF correspond to the 0–2.5T and 7–9T magnetic field range, respectively.  $R_{sh}$  is the sheet resistance, calculated as  $R_{xx} w/L$ , where  $R_{xx}$  is the longitudinal resistance measured in a four probe configuration, at  $B = 0\text{ T}$  and  $T = 2\text{ K}$ . Calculated  $R_{sh}$  values for as-grown and ZnO/Bi<sub>2</sub>Se<sub>3</sub> nanoribbons are similar, about ~200  $\Omega/\text{sq.}$ . Hall mobility  $\mu$  is calculated as  $1/(R_{sh} e n_{2D\ HF})$ . For both as-grown and encapsulated nanoribbons the values of  $\mu$  are also very close, about 2000 and ~2200  $\text{cm}^2/\text{Vs}$  respectively.

The field effect mobility  $\mu_{FE}$  can be evaluated as  $\mu_{FE} = \frac{L}{w} \cdot \frac{dG_{xx}}{dV_g} \cdot \frac{1}{C}$ , where  $G_{xx}$  is the conductance in the linear region of  $G_{xx}(V_g)$  dependence,  $C$  is the back-gate capacitance,  $w$  and  $L$  is the width and length of the nanoribbon. The back-gate capacitance can be estimated as  $C = \epsilon\epsilon_0/d$ , where  $\epsilon_0$  is the vacuum permittivity,  $\epsilon$  is the dielectric constant of the SiO<sub>2</sub> or h-BN,  $d$  is the thickness of the back-gate dielectric ( $\epsilon_{SiO_2} \sim 3.9$ ,  $\epsilon_{hBN} \sim 4$ ).

## 2. Magnetotransport data analysis using the two-carrier model

Figure 1S a, c shows the conductance tensor element  $G_{xy}(B)$  and  $G_{xx}(B)$  curves calculated in agreement with the equations 2.a and 2.b of the main text with the best fits from the two-carrier model (equations 3.a and 3.b, main text), for the ZnO/Bi<sub>2</sub>Se<sub>3</sub> nanoribbons

A1b and D3b. Extracted values of the charge carrier densities at  $V_g = 0V$  for the nanoribbon A1b are  $n_1 = 7.18 \cdot 10^{12} \text{ cm}^{-2}$  and  $n_2 = 5.31 \cdot 10^{12} \text{ cm}^{-2}$  and mobilities  $\mu_1 = 4700 \text{ cm}^2/\text{Vs}$ ,  $\mu_2 = 2052 \text{ cm}^2/\text{Vs}$ . These values of the two bands are similar also for the nanoribbon D3b, where  $n_1 = 6.24 \cdot 10^{12} \text{ cm}^{-2}$ ;  $n_2 = 4.99 \cdot 10^{12} \text{ cm}^{-2}$  and  $\mu_1 = 4800 \text{ cm}^2/\text{Vs}$ ;  $\mu_2 = 1350 \text{ cm}^2/\text{Vs}$ . The band 1 characterised with the highest  $n_1$  and  $\mu_1$  values representing the carriers from the nanoribbon surfaces, while the band 2 with carrier density  $n_2$  and mobility  $\mu_2$  correspond the nanoribbon bulk. The back gate voltage dependences of  $n_1$ ;  $n_2$  and  $\mu_1$ ;  $\mu_2$  for nanoribbon A1b are plotted in Figure 1S b. The  $n$  values of both bands slightly decrease applying negative back-gate voltages, indicating moderate depletion of the interface and the bulk carriers. The  $\mu_1$ ;  $\mu_2$  values remain instead practically unchanged in the back-gate voltage range 0 - -40V. At larger negative back-gate voltage of -65V the  $\mu_2$  representing the bottom surface / substrate interface carriers increase to about  $2700 \text{ cm}^2/\text{Vs}$ , indicating reduction of the scattering centres at the bulk.

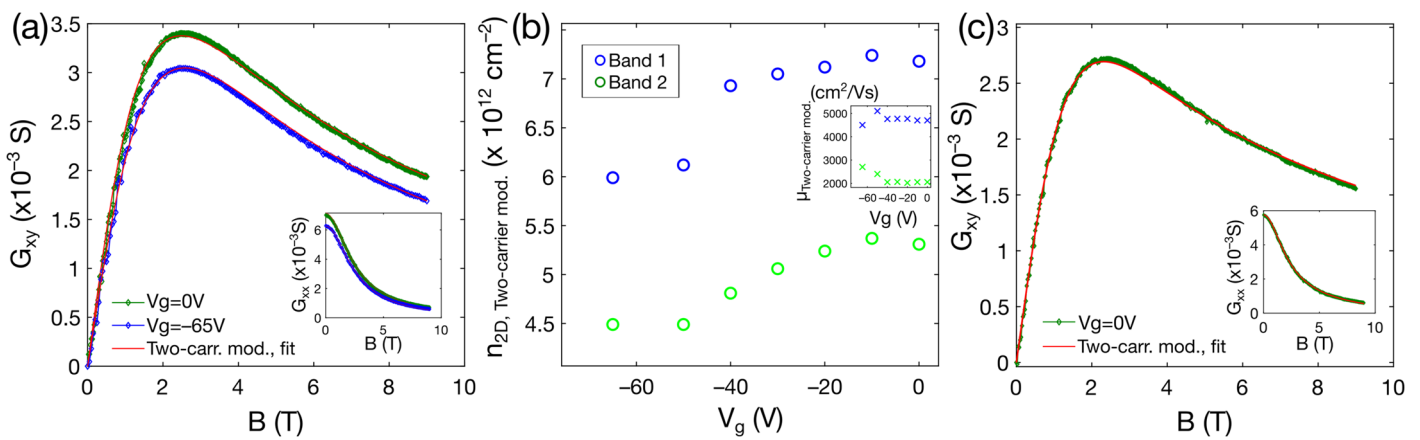

**Figure S1.** Two-carrier analysis of the ZnO/Bi<sub>2</sub>Se<sub>3</sub> nanoribbon magnetotransport data measured on nanoribbon A1b: (a) Conductance tensor element  $G_{xy}(B)$  curves at  $V_g = 0V$ , and  $V_g = -65V$ , with the fits of the two-carrier model (red solid lines), and in the inset - corresponding fitted  $G_{xx}(B)$  data. (b) From the two-carrier mod. extracted values of the carrier densities  $n_1$ ;  $n_2$ , and mobilities  $\mu_1$ ;  $\mu_2$  (in the inset), plotted as a function of the back-gate voltage. Nanoribbon D3b: (c) Conductance tensor element  $G_{xy}(B)$  and  $G_{xx}(B)$  curves at  $V_g = 0V$ , red solid lines are the fits of the two-carrier model.

### 3. Shubnikov-de Haas oscillations of the ZnO encapsulated Bi<sub>2</sub>Se<sub>3</sub> nanoribbons

The magnetic field dependence of the longitudinal resistance  $R_{xx}$  for a ~35 nm thin ZnO/Bi<sub>2</sub>Se<sub>3</sub> nanoribbon shows oscillations in  $R_{xx}$ , at magnetic field above ~5 T. These are the Shubnikov-de Haas oscillations, and the extracted oscillatory part  $\Delta R_{xx}$  as a function of the inverse magnetic field is depicted in Figure 2S b. The FFT spectra of these data shows two main frequencies  $F_1 \sim 40 \text{ T}$  and  $F_2 \sim 99 \text{ T}$ . The highest frequency  $F_2$  has previously been reported to correspond to the carriers from the surface Dirac states, originating from the nanoribbon top surface [1]. In this case, the 2D carrier density  $n_{2D, \text{SdH}}$  can be estimated as  $k_F^2/4\pi$ ;  $F = (\hbar/(2\pi e))A_0$ ;  $A_0 = \pi k_F^2$ , where  $k_F$  is the Fermi wave vector,  $F$  is the SdH oscillation frequency,  $A_0$  is the Fermi surface area. From  $F_2$  we calculate  $n_{2D, \text{SdH}} = 2.40 \cdot 10^{12} \text{ cm}^{-2}$ . This leaves an open question for the identification of the lowest frequency  $F_1$ .  $F_1$  can be attributed to the bulk carriers which results in a 3D carrier density  $n_{3D, \text{SdH, Bulk}} = 1/(2\pi)^2(4/3)k_F^3$  is  $1.4 \cdot 10^{18} \text{ cm}^{-3}$  in agreement with values obtained from Hall measurements (see 2 band analysis in main text).

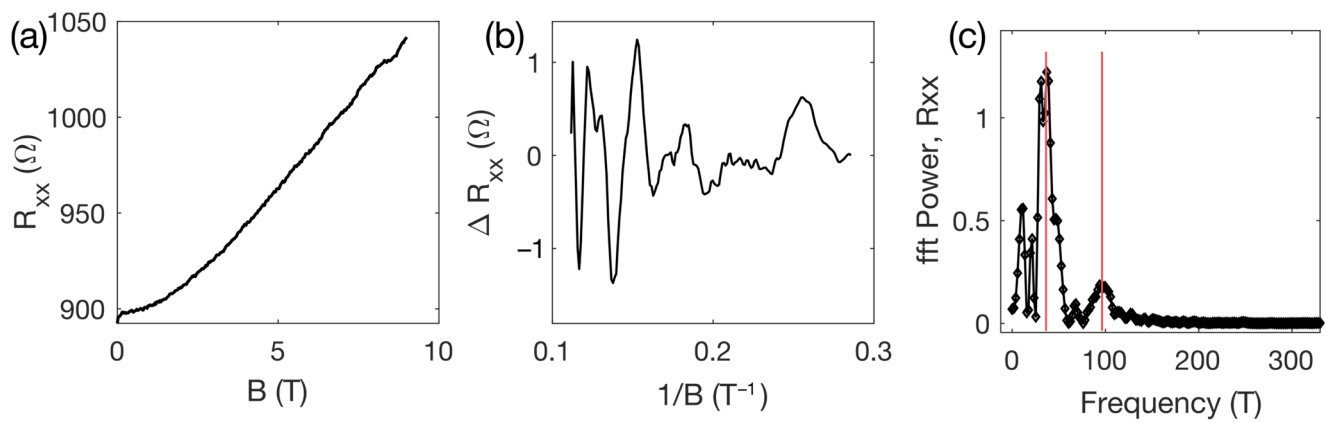

**Figure S2.** (a)  $R_{xx}(B)$  dependence. (b) Oscillatory part of the  $R_{xx}(B)$ , plotted versus inverse magnetic field. (c) FFT spectra of the  $R_{xx}(B)$  data. Data shown correspond to ZnO/Bi<sub>2</sub>Se<sub>3</sub> nanoribbon A1b.

## References

- [1] G. Kunakova, L. Galletti, S. Charpentier, J. Andzane, D. Ertz, F. Léonard, C. D. Spataru, T. Bauch, and F. Lombardi, *Bulk-Free Topological Insulator Bi<sub>2</sub>Se<sub>3</sub> Nanoribbons with Magnetotransport Signatures of Dirac Surface States*, *Nanoscale* **10**, 19595 (2018).
